# Supplementary material for: Two d10 luminescent metal–organic frameworks as dual functional luminescent sensors for (Fe3+,Cu2+) and 2,4,6-trinitrophenol (TNP) with high selectivity and sensitivity
Source: Royal Society of Chemistry journal article supplement (doi:10.1039/c9ra07709j), 2020-01-01
Supplement: c9ra07709j1.pdf [file c9ra07709j1.pdf]

# Electronic Supplementary Information (ESI) for:

**Two d<sup>10</sup> luminescent metal organic frameworks as dual functional luminescent sensors for (Fe<sup>3+</sup>, Cu<sup>2+</sup>) and 2,4,6-trinitrophenol(TNP) with high selectivity and sensitivity**

**Xiaojing Zhou,<sup>\*a</sup> Xiaolei Guo,<sup>b</sup> Lili liu,<sup>a</sup> Haidong Zhai,<sup>a</sup> Qingguo Meng,<sup>a</sup> Zhan shi,<sup>b</sup> Xishi Tai,<sup>\*a</sup>**

*<sup>a</sup>School of chemical & Chemical Engineering and enviromental engineering ,Weifang University, Weifang, 261061, P. R China*

*<sup>b</sup>State Key Laboratory of Inorganic Synthesis & Preparative Chemistry, College of Chemistry, Jilin University, Changchun, 130012, P. R China*

**Table S1.** Selected bond distances (Å) and angles (°) for **1**

|                                        |            |                                          |            |
|----------------------------------------|------------|------------------------------------------|------------|
| Cd1-O1                                 | 2.187(4)   | Cd2-O5 <sup>iii</sup>                    | 2.228(3)   |
| Cd1-O5 <sup>i</sup>                    | 2.284(3)   | Cd2-O5                                   | 2.228(3)   |
| Cd1-N2                                 | 2.314(4)   | Cd2-O2 <sup>iv</sup>                     | 2.261(4)   |
| Cd1-N3                                 | 2.321(4)   | Cd2-O2 <sup>v</sup>                      | 2.261(4)   |
| Cd1-O4 <sup>ii</sup>                   | 2.437(4)   | Cd2-O4 <sup>vi</sup>                     | 2.288(4)   |
| Cd1-O3 <sup>ii</sup>                   | 2.443(4)   | Cd2-O4 <sup>vii</sup>                    | 2.288(4)   |
| O1-Cd1-O5 <sup>i</sup>                 | 104.49(15) | O5 <sup>iii</sup> -Cd2-O5                | 180.0      |
| O1-Cd1-N2                              | 165.48(15) | O5 <sup>iii</sup> -Cd2-O2 <sup>iv</sup>  | 86.50(14)  |
| O5 <sup>i</sup> -Cd1-N2                | 82.81(15)  | O5-Cd2-O2 <sup>iv</sup>                  | 93.50(14)  |
| O1-Cd1-N3                              | 95.32(16)  | O5 <sup>iii</sup> -Cd2-O2 <sup>v</sup>   | 93.50(14)  |
| O5 <sup>i</sup> -Cd1-N3                | 124.17(14) | O5-Cd2-O2 <sup>v</sup>                   | 86.50(14)  |
| N2-Cd1-N3                              | 70.33(16)  | O2 <sup>iv</sup> -Cd2-O2 <sup>v</sup>    | 180.0      |
| O1-Cd1-O4 <sup>ii</sup>                | 102.48(14) | O5 <sup>iii</sup> -Cd2-O4 <sup>vi</sup>  | 103.78(13) |
| O5 <sup>i</sup> -Cd1-O4 <sup>ii</sup>  | 72.30(13)  | O5-Cd2-O4 <sup>vi</sup>                  | 76.21(13)  |
| N2-Cd1-O4 <sup>ii</sup>                | 91.65(15)  | O2 <sup>iv</sup> -Cd2-O4 <sup>vi</sup>   | 87.44(16)  |
| N3-Cd1-O4 <sup>ii</sup>                | 151.79(14) | O2 <sup>v</sup> -Cd2-O4 <sup>vi</sup>    | 92.56(16)  |
| O1-Cd1-O3 <sup>ii</sup>                | 93.29(16)  | O5 <sup>iii</sup> -Cd2-O4 <sup>vii</sup> | 76.22(13)  |
| O5 <sup>i</sup> -Cd1-O3 <sup>ii</sup>  | 125.45(13) | O5-Cd2-O4 <sup>vii</sup>                 | 103.79(13) |
| N2-Cd1-O3 <sup>ii</sup>                | 92.47(16)  | O2 <sup>iv</sup> -Cd2-O4 <sup>vii</sup>  | 92.56(16)  |
| N3-Cd1-O3 <sup>ii</sup>                | 104.30(15) | O2 <sup>v</sup> -Cd2-O4 <sup>vii</sup>   | 87.44(16)  |
| O4 <sup>ii</sup> -Cd1-O3 <sup>ii</sup> | 53.46(13)  | O4 <sup>vi</sup> -Cd2-O4 <sup>vii</sup>  | 180.0      |

Symmetry transformations used to generate equivalent atoms: (i)  $x+1, y, z$ ; (ii)  $x+1/2, -y+3/2, z+1/2$ ; (iii)  $-x-1/2, -y+3/2, -z+1$ ; (iv)  $-x+1/2, -y+3/2, -z+1$ ; (v)  $x-1, y, z$ ; (vi)  $x-1/2, -y+3/2, z+1/2$ ; (vii)  $-x, y, -z+1/2$ ; (viii)  $x-1/2, -y+3/2, z-1/2$ ;

**Table S2.** Selected bond distances (Å) and angles (°) for **2**

|                                         |            |                                         |            |
|-----------------------------------------|------------|-----------------------------------------|------------|
| Zn1-O2 <sup>i</sup>                     | 2.018(2)   | Zn2-O4 <sup>iii</sup>                   | 1.983(3)   |
| Zn1-O2                                  | 2.018(2)   | Zn2-O1                                  | 2.010(2)   |
| Zn1-O3 <sup>ii</sup>                    | 2.103(2)   | Zn2-O5 <sup>v</sup>                     | 2.107(2)   |
| Zn1-O3 <sup>iii</sup>                   | 2.103(2)   | Zn2-N1                                  | 2.115(3)   |
| Zn1-O5 <sup>iv</sup>                    | 2.160(2)   | Zn2-N2                                  | 2.189(3)   |
| Zn1-O5 <sup>v</sup>                     | 2.160(2)   | Zn2-O6 <sup>v</sup>                     | 2.381(3)   |
| O2 <sup>i</sup> -Zn1-O2                 | 179.999(1) | O4 <sup>iii</sup> -Zn2-O1               | 97.55(11)  |
| O2 <sup>i</sup> -Zn1-O3 <sup>ii</sup>   | 92.83(10)  | O4 <sup>iii</sup> -Zn2-O3 <sup>ii</sup> | 98.32(10)  |
| O2-Zn1-O3 <sup>iii</sup>                | 87.17(10)  | O1-Zn2-O5 <sup>v</sup>                  | 103.51(9)  |
| O2 <sup>i</sup> -Zn1-O3 <sup>iii</sup>  | 87.17(10)  | O4 <sup>iii</sup> -Zn2-N1               | 110.29(12) |
| O2-Zn1-O3 <sup>iii</sup>                | 92.83(10)  | O1-Zn2-N1                               | 92.47(11)  |
| O3 <sup>ii</sup> -Zn1-O3 <sup>iii</sup> | 180.0      | O5 <sup>v</sup> -Zn2-N1                 | 145.06(11) |
| O2 <sup>i</sup> -Zn1-O5 <sup>iv</sup>   | 91.93(9)   | O4 <sup>iii</sup> -Zn2-N2               | 86.21(12)  |
| O2-Zn1-O5 <sup>iv</sup>                 | 88.07(9)   | O1-Zn2-N2                               | 168.04(11) |
| O3 <sup>ii</sup> -Zn1-O5 <sup>iv</sup>  | 92.29(9)   | O5 <sup>i</sup> -Zn2-N2                 | 87.08(10)  |
| O3 <sup>iii</sup> -Zn1-O5 <sup>iv</sup> | 87.71(9)   | N1-Zn2-N2                               | 75.59(12)  |
| O2 <sup>i</sup> -Zn1-O5 <sup>v</sup>    | 88.07(9)   | O4 <sup>iii</sup> -Zn2-O6 <sup>v</sup>  | 156.16(10) |
| O2-Zn1-O5 <sup>v</sup>                  | 91.93(9)   | O1-Zn2-O6 <sup>v</sup>                  | 93.76(10)  |
| O3 <sup>ii</sup> -Zn1-O5 <sup>v</sup>   | 87.71(9)   | O5 <sup>v</sup> -Zn2-O6 <sup>v</sup>    | 58.50(9)   |
| O3 <sup>iii</sup> -Zn1-O5 <sup>v</sup>  | 92.29(9)   | N1-Zn2-O6 <sup>v</sup>                  | 90.03(11)  |
| O5 <sup>iv</sup> -Zn1-O5 <sup>v</sup>   | 180.00(14) | N2-Zn2-O6 <sup>v</sup>                  | 87.01(10)  |

Symmetry transformations used to generate equivalent atoms: (i)  $-x+1, -y+1, -z+1$ ; (ii)  $-x+2, -y+1, -z+1$ ; (iii)  $x-1, y, z$ ; (iv)  $-x+1, -y, -z+1$ ; (v)  $x, y+1, z$ ; (vi)  $x, y-1, z+1/2$ ; (vii)  $x+1, y, z$ .

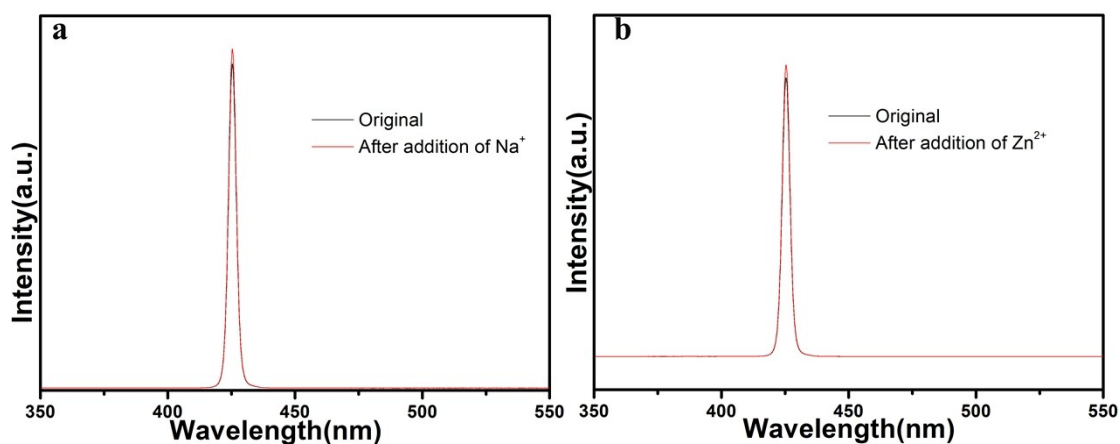

**Fig.S1 a)** The emission of the original compound **1** emulsion and after the addition of 1000  $\mu\text{L}$   $\text{Na}^+$  (0.01 M) solution; **b)** The emission of the original compound **1** emulsion and after the addition of 1000  $\mu\text{L}$   $\text{Zn}^{2+}$  (0.01 M) solution

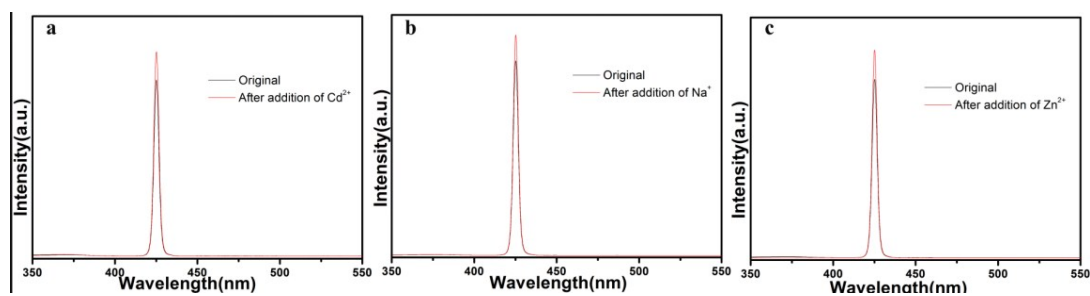

Fig.S2 a) The emission of the original compound 2 emulsion and after the addition of 1000  $\mu\text{L}$   $\text{Cd}^{2+}$  (0.01 M) solution; b) The emission of the original compound 2 emulsion and after the addition of 1000  $\mu\text{L}$   $\text{Na}^+$  (0.01 M) solution; c) The emission of the original compound 2 emulsion and after the addition of 1000  $\mu\text{L}$   $\text{Zn}^{2+}$  (0.01 M) solution

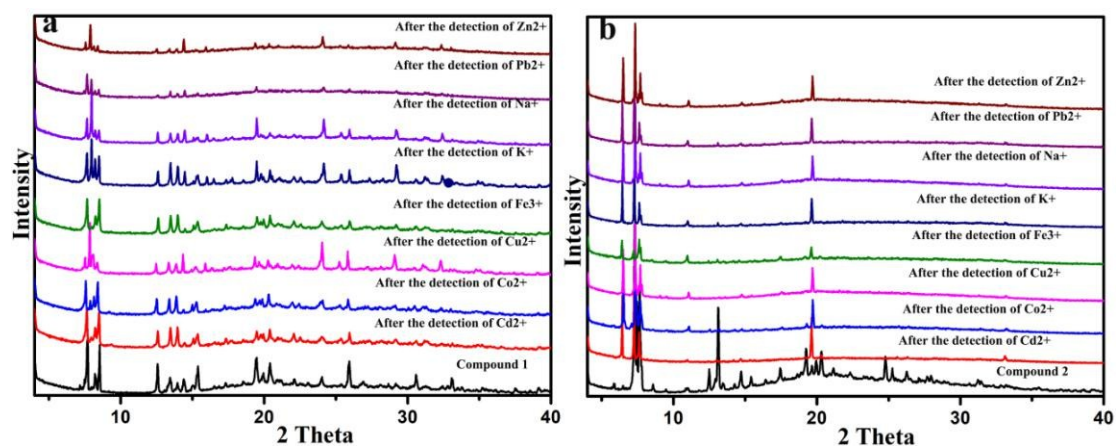

Fig.S3 a) The PXRD of compound 1 and after the detection of the metal ions; b) The PXRD of compound 2 and after the detection of the metal ions

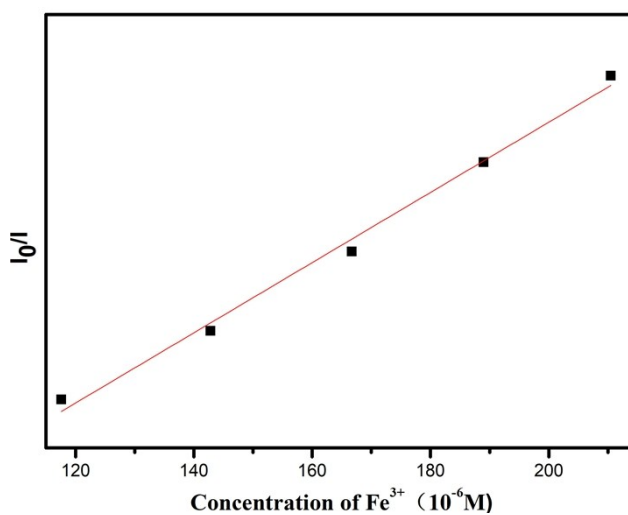

Fig. S4 Stern-Volmer plots of  $I_0/I$  vs. the concentration of  $\text{Fe}^{3+}$  ion of compound 1

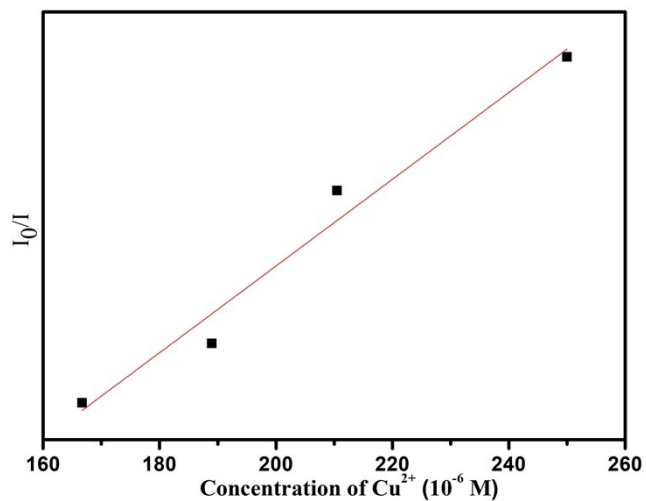

Fig. S5 Stern-Volmer plots of  $I_0/I$  vs. the concentration of  $\text{Cu}^{2+}$  ion of compound 1

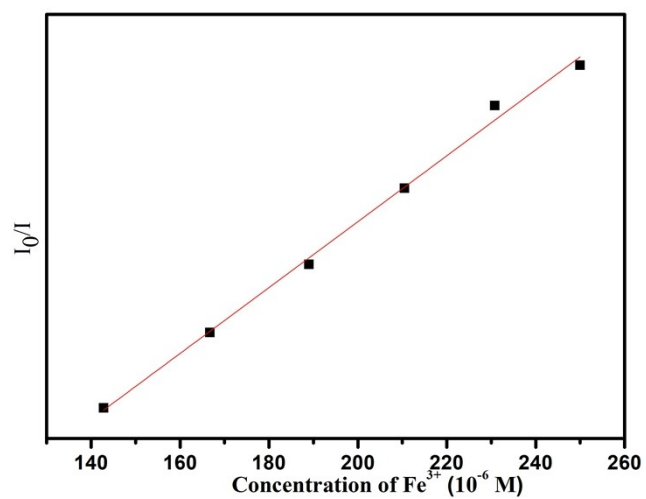

Fig. S6 Stern-Volmer plots of  $I_0/I$  vs. the concentration of  $\text{Fe}^{3+}$  ion of compound 2

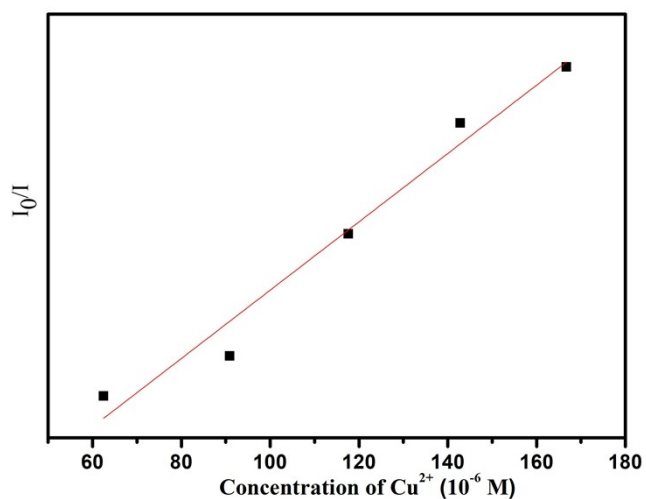

Fig. S7 Stern-Volmer plots of  $I_0/I$  vs. the concentration of  $\text{Cu}^{2+}$  ion of compound 2

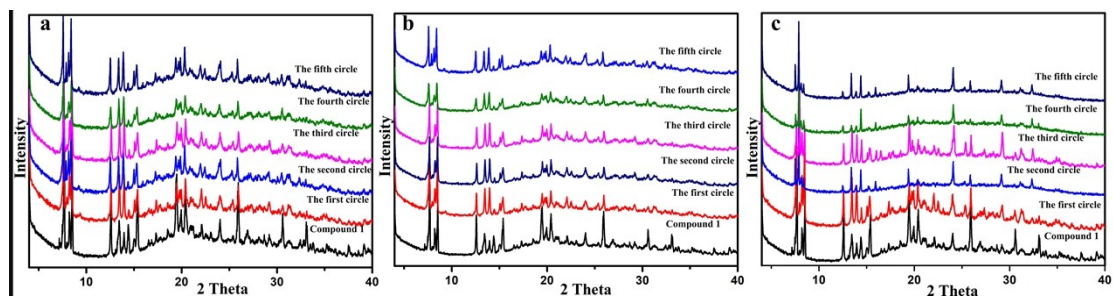

Fig. S8 a) Five circle PXRD experiments of compound 1 after sensing  $\text{Fe}^{3+}$ ; b) Five circle PXRD experiments of compound 1 after sensing  $\text{Cu}^{2+}$ ; c) Five circle PXRD experiments of compound 1 after sensing TNP

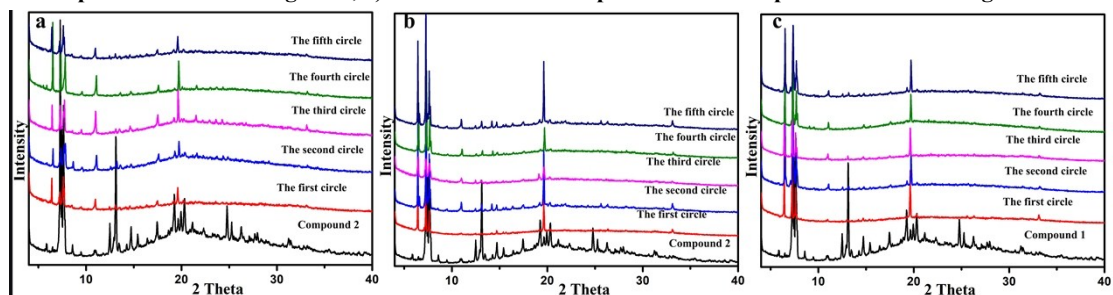

Fig. S9 a) Five circle PXRD experiments of compound 2 after sensing  $\text{Fe}^{3+}$ ; b) Five circle PXRD experiments of compound 2 after sensing  $\text{Cu}^{2+}$ ; c) Five circle PXRD experiments of compound 2 after sensing TNP

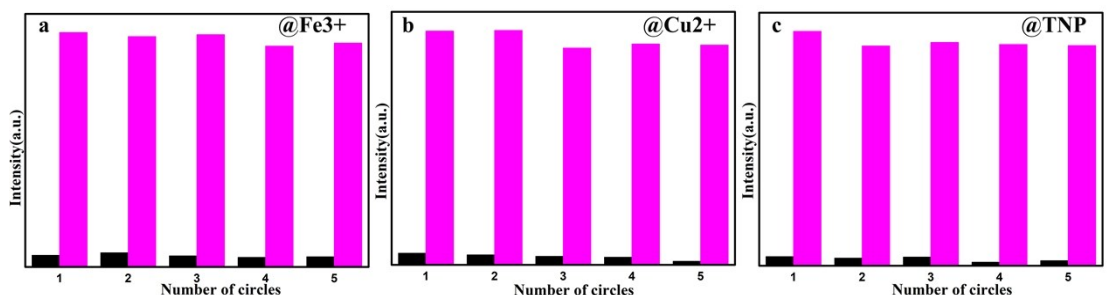

Fig. S10 a) Five circle test of compound 1a towards sensing  $\text{Fe}^{3+}$  in DMF; b) Five circle test of compound 1a towards sensing  $\text{Cu}^{2+}$  in DMF; c) Five circle test of compound 1a towards sensing TNP in DMF

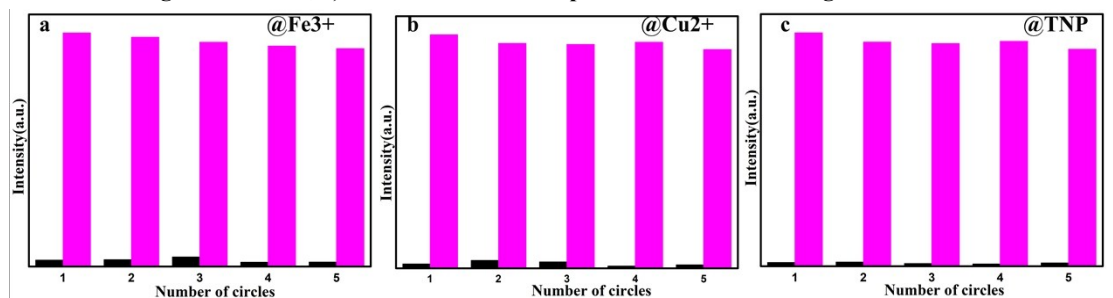

Fig. S11 a) Five circle test of compound 1b towards sensing  $\text{Fe}^{3+}$  in DMF; b) Five circle test of compound 1b towards sensing  $\text{Cu}^{2+}$  in DMF; c) Five circle test of compound 1b towards sensing TNP in DMF

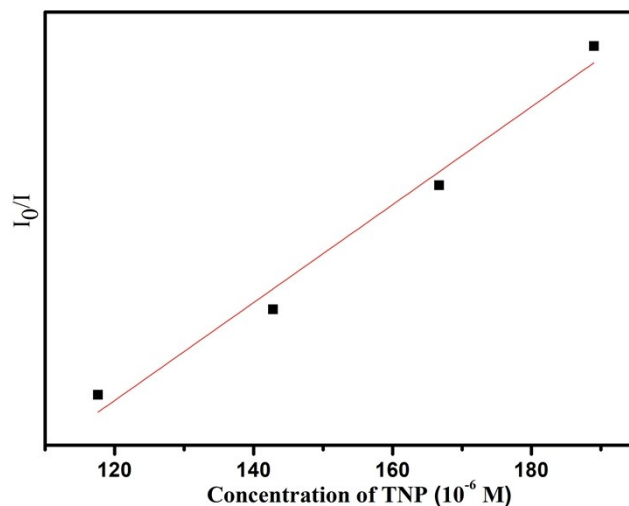

Fig. S12 Stern-Volmer plots of  $I_0/I$  vs. the concentration of TNP of compound 1

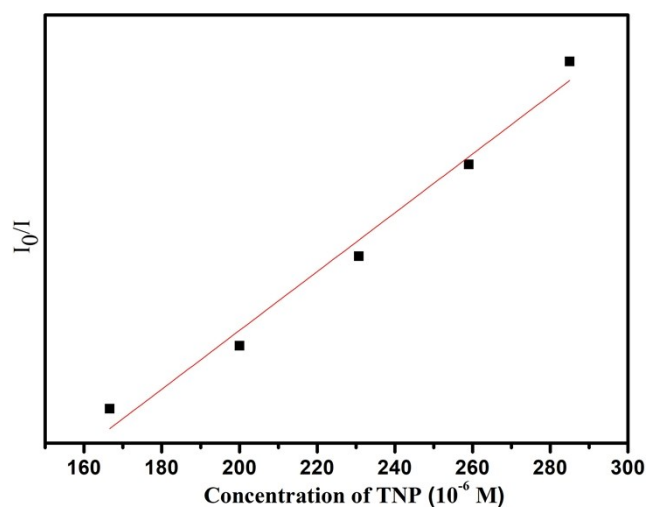

Fig. S13 Stern-Volmer plots of  $I_0/I$  vs. the concentration of TNP of compound 2

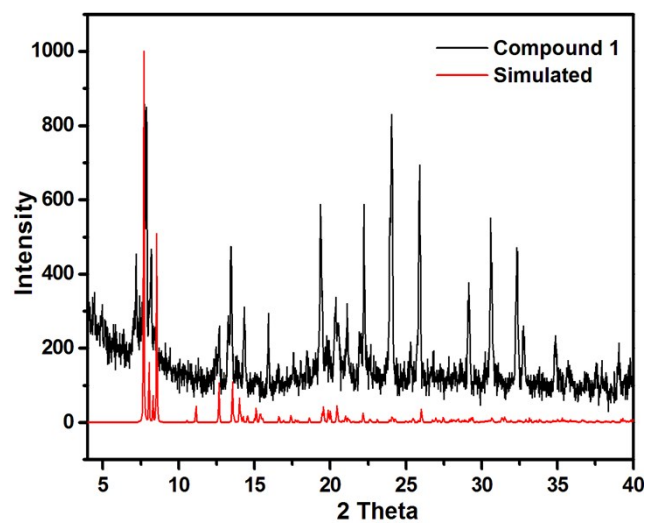

Fig. S14 The PXRD of compound 1

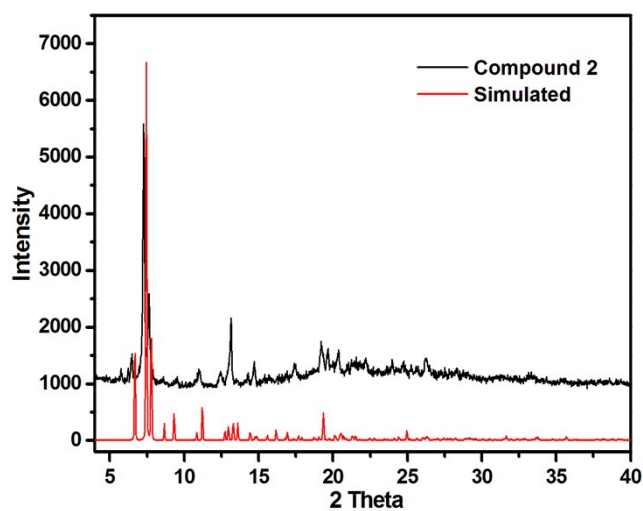

Fig. S15 The PXRD of compound 2

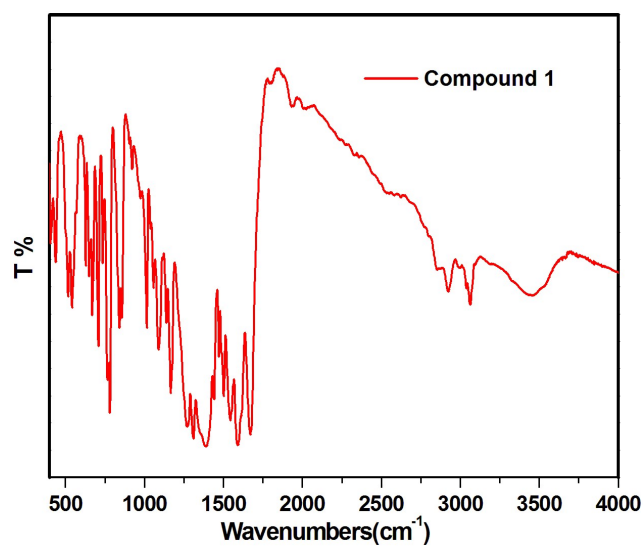

Fig. S16 The IR spectrum of compound 1

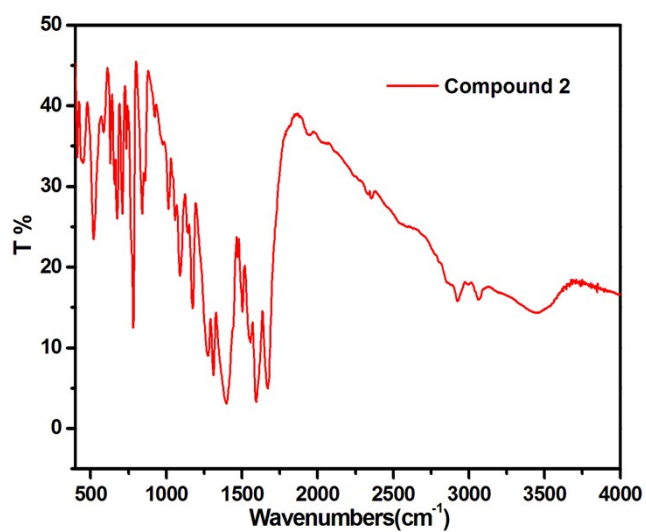

Fig. S17 The IR spectrum of compound 2

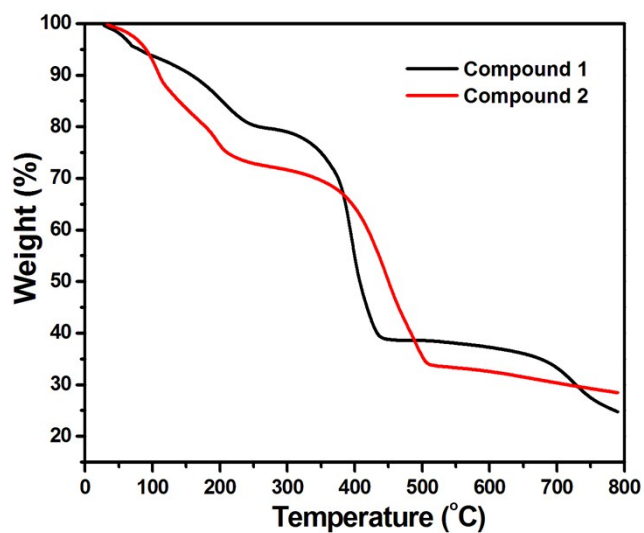

**Fig. S18 TGA of compounds 1 and 2**

To investigate the thermal stability of compound 1 and 2, thermogravimetric analysis (TGA) was performed under  $N_2$  atmosphere. The results indicate that compound 1 may completely release the guest molecules up to 280 °C. It shows two distinct weight losses of 30-74 °C (5.4 %) and 74-281 °C (13.6 %), attributing to the loss of one water, one  $CH_3CH_2OH$  and three DMF molecules, respectively, as to compound 2, it released four DMF, one  $H_2O$ , one  $CH_3CH_2OH$  molecules at 216 °C (22 %).
